# Supplementary material
Source: publisher figshare collection journal article supplement (https://karger.figshare.com/ndownloader/files/8117732)
Supplement: Supplementary file 1 [file 8117732]

| **Supplementary Table**  ETDRS in eyes with typical age-related macular degeneration treated with PRN or bimonthly aflibercept injections after the initial three injections | | | | | | | | |
| --- | --- | --- | --- | --- | --- | --- | --- | --- |
|  |  |  |  |  |  |  |  |  |
| Month | 0 | p-value | 3 | p-value | 6 | p-value | 12 | p-value |
| PRN group | 67.43 | 0.611† | 71.63 | 0.011* | 71.77 | 0.023* | 71.23 | 0.072 |
| bimonthly group | 65.75 | 71.35 | 0.001* | 70.79 | 0.014* | 72.82 | 0.00005* |
| † Compared with PRN group and bimonthly group at baseline | | | | |  |  |  |  |
| 3, 6,12 months were compared with baseline of each group using independent T-test | | | | | | |  |  |
| *p<0.05 |  |  |  |  |  |  |  |  |
